# Supplementary material for: Enhanced light harvesting and charge separation over wormhole mesoporous TiO2−X nanocrystallites towards efficient hydrogen generation
Source: Royal Society of Chemistry journal article supplement (doi:10.1039/c8se00580j), 2019-01-01
Supplement: c8se00580j1.pdf [file c8se00580j1.pdf]

## Supplementary Information

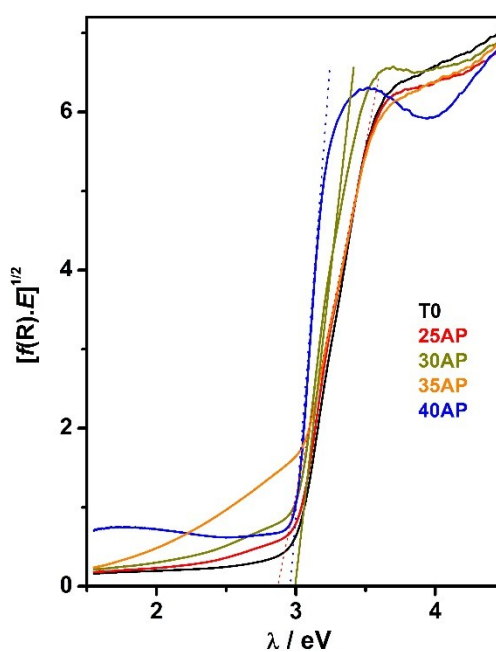

**Figure S1.** Tauc's plots of all meso-TiO<sub>2-x</sub> catalysts are shown; meso-TiO<sub>2-x</sub> materials exhibits enhanced absorption in the visible region of spectra.

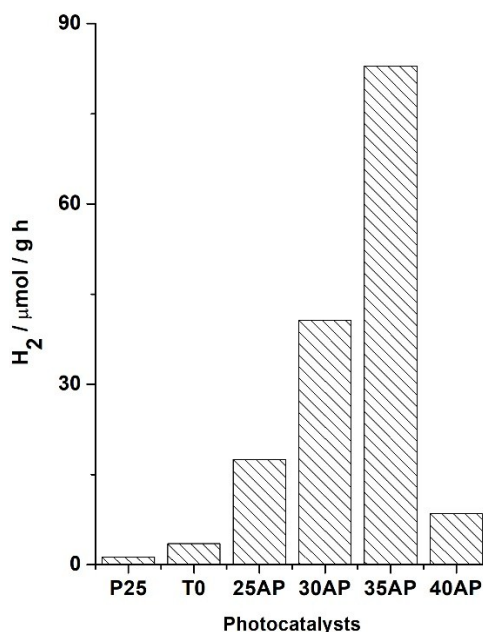

**Figure S2.** Hydrogen generation results of meso-TiO<sub>2-x</sub> material under visible light in an aq. methanol solution. Increase in the H<sub>2</sub> generation by an order of 5 can be observed for 35AP in comparison to T0.

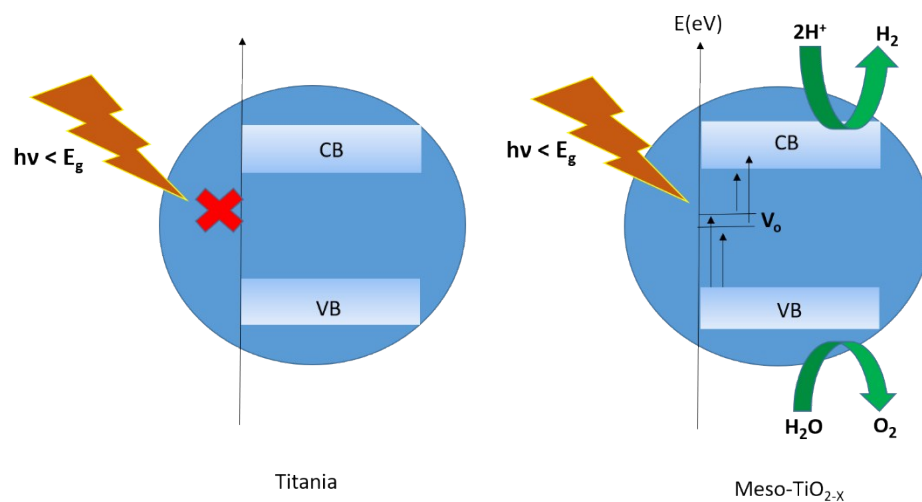

**Figure S3.** A schematic diagram showing lower energy visible light photon absorption by meso-TiO<sub>2-x</sub> materials available in AM1.5 irradiation for photocatalysis.
